# Supplementary material for: Mouse model of uncoupled bone remodeling upon discontinuation of anti-RANKL antibody therapy
Source: Research Square preprint supplement (doi:10.21203/rs.3.rs-4720958/v1), 2024-08-27
Supplement: Supplementary file 1 [file 0423d928d8476388af16a1fa.xlsx]

## Sheet: Figure1
	Figure1 A
	Patients	0-TRACP-before	1-TRACP-Last	2-TARCP-After		0-LS-Before	1-LS-After	2-LS-After Dis		1-FN-Before	3-FN-Last	FN% change		Patients	Number of injection(Denosumab)	Interval from 'Before Injection' to 'Last Injection' [Months]	Interval from 'Last Injection' to 'After discontinuation' [Months]
	1	600	332	654		0.699	0.808	0.714		No data due to bilateral femoral fracture				Discontinuation-No.1	4	24	10
	2	463	177	793		0.9	0.934	0.907		0.557	0.581	0.586		Discontinuation-No.2	4	24	13
	3	849	124	1813		0.646	0.759	0.642		0.39	0.449	0.327		Discontinuation-No.3	4	24	14
	4	683	187	1240		1.058	1.095	1.049		0.503	0.536	0.527		Discontinuation-No.4	9	54	18
	5	717	214	849		0.609	0.718	0.544		0.4	0.442	0.302		Discontinuation-No.5	2	12	30
	6	370	265	604		0.926	0.992	0.932		0.704	0.704	0.671		Discontinuation-No.6	2	12	12
	7	384	176	459		0.691	0.778	0.727		0.61	0.669	0.567		Discontinuation-No.7	5	30	30
	8	210	137	364		0.707	0.718	0.72		0.369	0.364	0.352		Discontinuation-No.8	5	30	10
	Figure1 B
	LS% change				FN% change				Patients	Interval of DXA assessment (Months)
	Non-treated	Discontinuation			Non-treated	Discontinuation			Control-No.1	12
	-11.6337	5.7971			-2.43446	No data due to bilateral femoral fracture			Control-No.2	24
	-2.89079	0.921053			1.81818	0.860585			Control-No.3	19
	-15.415	1.32979			1.70279	-27.1715			Control-No.4	12
	-4.20091	0.137741			-1.69753	-1.6791			Control-No.5	40
	-24.234	2.92072			1.35823	-31.6742			Control-No.6	26
	-6.04839	-1.87919			0.341297	-4.6875			Control-No.7	12
	-6.55527	-0.357143			-5	-15.2466			Control-No.8	14
	0.278552	-0.265252			0.760456	-3.2967			Discontinuation-No.1	10
									Discontinuation-No.2	13
									Discontinuation-No.3	14
									Discontinuation-No.4	18
									Discontinuation-No.5	30
									Discontinuation-No.6	12
									Discontinuation-No.7	30
									Discontinuation-No.8	10
	Figure1 D
	Weeks	Control							Discontinuation
	-4	8.243	6.4485	6.35	6.748	6.594	5.778	7.405	7.001	8.3495	8	8.2	7.4	6.8	7
	-2	7.372	5.597	6.017	8.31	8.977	6.625	8.641	2.061	1.707	2.169	2.381	1.661	1.891	1.412
	0	6.938	4.189	7.3	4.528	4.737	5.533	7.075	0.601	0.263	0.426	0.495	0.326	0.294	0.495
	2	5.662	4.185	5.031	2.838	3.371	3.246	4.516	0.474	0.502	0.759	0.363	0.502	0.454	0.627
	4	5.282	4.3	10.367	7.024	7.317	7.538	11.002	1.06	0.648	0.896	0.505	1.317	0.795	1.103
	6	5.483	4.048	8.197	5.681	8.052	4.473	7.269	1.836	1.571	3.154	0.95	12.173	1.106	1.602
	8	5.126	4.655	4.428	3.995	4.325	4.351	5.585	3.887	1.983	10.819	3.919	9.622	2.595	6.101
	10	7.264	7.691	5.279	6.927	5.994	5.468	7.336	16.443	8.495	10.913	10.913	6.89	12.319	11.952
	12	7.763	8.38	4.191	3.384	3.866	3.353	4.162	9.16	6.764	4.949	6.13	4.162	5.929	5.382
	14	4.739	4.505	3.103	3.04	3.294	2.665	4.081	5.451	4.591	3.52	3.391	2.789	4.557	3.262
	Figure1 E
	Acp5			Ctsk
	Control	Discontinuation		Control	Discontinuation
	0.72464	2.69282		0.86598	3.49408
	0.132567	1.78372		0.0154049	1.91799
	0.916068	2.40887		1.26347	2.40099
	2.22672	2.75823		1.85515	2.71043
	Figure1 F
	10-12 W			10-16W
	Control	Discontinuation		Control	Discontinuation
	-25	-41.6183		-25	-82.929
	4	-56.0776		-52	-90.9393
	-28.9855	-92.7851		-14.4928	-96.7539
	-45.098	-66.9254		-21.5686	-90.5254
	-21.3793	-75.4931		-22.7586	-94.6349
	0	-59.721		-27.881	-85.5

## Sheet: Figure2
	Figure2 B
	Trabecular BMD			BV/TV			Trabeculat thickness			Trabecular number
	Non-treated	Discontinuation		Non-treated	Discontinuation		Non-treated	Discontinuation		Non-treated	Discontinuation
	502.8	494.8		9.60283	5.5224		24.7019	30.748		3.88748	1.79602
	563.7	449.3		17.6509	3.94095		29.4044	26.1455		6.00283	1.50731
	547.6	502.5		20.4708	12.5416		32.9946	34.5203		6.20428	3.63311
	548.1	516.7		10.8999	8.77482		28.0548	35.5048		3.88523	2.47145
	532.2	406.3		6.1543	6.53241		38.3897	28.9138		1.60312	2.25927
	528	378.7		13.1413	5.66624		44.079	26.3047		2.98131	2.15408
	Cortical BMD			Cortical thickness			Cortical porosity
	Non-treated	Discontinuation		Non-treated	Discontinuation		Non-treated	Discontinuation
	867.2	755.2		194.787	180.813		2.85833	3.07182
	885.8	674.1		197.163	162.233		2.62415	3.58775
	866.8	706.7		199.619	187.932		2.74948	3.87549
	868	681.4		207.532	171.348		2.61154	3.7418
	774.2	665.7		204.133	153.43		4.58324	6.03985
	749.2	706.4		198.947	159.123		4.54554	5.64006
	Spine BMD			Spine BV/TV
	Non-treated	Discontinuation		Non-treated	Discontinuation
	590.2	547.2		31.3096	27.2847
	605	520.3		34.9566	23.767
	596.6	570.6		32.1554	29.0976
	606.4	546.3		28.7161	26.917
	524.6	439.2		32.7294	28.8335
	554.2	477.7		36.9643	33.0581
	Figure2 C
	MTMR			CTPR			Crystalinity
	Non-treated	Discontinuation		Non-treated	Discontinuation		Non-treated	Discontinuation
	4.56266	4.31313		0.012918	0.012418		1.05529	1.06049
	4.57706	4.13387		0.015197	0.011881		1.02382	1.05937
	4.66256	4.24843		0.015095	0.012022		1.04045	1.06616
	4.44594	4.37144		0.013639	0.012022		1.04713	1.07592
	Figure2 D
	Maximum load			Breaking force			Stiffness			Beaking displacement			Breaking energy
	Non-treated	Discontinuation		Non-treated	Discontinuation		Non-treated	Discontinuation		Non-treated	Discontinuation		Non-treated	Discontinuation
	24.542	13.797		22.833	3.907		67.15	47.78		6.55	5.881		0.459	0.615
	25.397	15.995		22.955	6.96		94.32	39.85		6.974	10.349		0.41	0.918
	26.129	13.309		24.786	4.396		141.6	53.66		6.072	10.028		0.313	1.368
	26.374	15.629		17.338	4.151		102.14	37.48		9.616	7.928		0.635	0.752

## Sheet: Figure3.
	Figure3B
	Trabecular BMD				Trabecular BV/TB				Trabecular Thickness				Trabecular Number
	Control	anti-RANKl ab discontinuation	BP discontinuation		Control	anti-RANKl ab discontinuation	BP discontinuation		Control	anti-RANKl ab discontinuation	BP discontinuation		Control	anti-RANKl ab discontinuation	BP discontinuation
	533.845	528.367	532.635		11.5154	7.25132	11.5185		36.5316	37.6173	34.8569		4.56469	2.35724	4.60752
	548.568	438.938	552.635		12.4146	6.84326	12.8759		30.6849	29.5515	35.1548		3.94647	2.47693	3.87693
	552.474	458.468	478.534		11.7802	5.66258	13.5399		28.9755	32.5468	38.637		6.5763	3.54968	4.689
	528.988	431.947	528.844		9.54316	4.68462	10.3468		41.2835	27.5696	32.6162		4.61977	3.35221	2.94958
	537.987	458.778	501.233		15.5395	2.39654	7.64949		38.4572	38.6183	37.5815		5.84966	2.20265	5.31169
	Cortical BMD				Cortical Thickness				Cortical Porosity
	Control	anti-RANKl ab discontinuation	BP discontinuation		Control	anti-RANKl ab discontinuation	BP discontinuation		Control	anti-RANKl ab discontinuation	BP discontinuation
	869.649	755.468	849.779		201.636	179.849	189.959		2.31949	3.56989	3.15685
	887.615	768.595	798.558		189.636	159.656	178.548		3.5658	4.56948	3.46585
	896.969	698.658	816.494		203.624	179.545	199.848		3.4525	3.89584	2.5854
	799.848	628.254	849.664		207.69	158.595	204.525		2.15258	5.65985	3.45848
	898.858	658.585	732.565		199.565	167.151	199.525		3.6859	4.62584	3.93654
	Figure3C				Figure3D
	Osteoclast precursor				Protein concentrationin EVs (mg/ml)				Protein amount of EVs (mg)
	Control	anti-RANKl ab discontinuation	BP discontinuation		Control	anti-RANKl ab discontinuation	BP discontinuation		Control	anti-RANKl ab discontinuation	BP discontinuation
	0.056	0.12	0.065		0.64956	0.75458	0.569544		0.194868	0.226374	0.170863
	0.065	0.16	0.048		0.496268	0.896525	0.468549		0.14888	0.268958	0.140565
	0.065	0.12	0.075		0.684585	0.85459	0.689584		0.205375	0.256377	0.206875
	0.056	0.09	0.065		0.645658	0.758458	0.685469		0.193697	0.227537	0.205641
	0.078	0.14	0.065

## Sheet: Figure4.
	Figure4 A
	Oc number/Bone perimeter			Oc number/Bone surface			ES/BS
	Control	Anti-RANKL ab		Control	Anti-RANKL ab		Control	Anti-RANKL ab
	2.62817	11.1392		5.3648	22.7672		10.3155	51.055
	2.87781	12.2288		5.36049	25.629		10.9912	55.7457
	1.24093	22.7145		2.99945	54.9924		13.1306	33.4419
	Figure4 B			Figure4 C
	TRAP+ MNCs number / cm2			TRAP+ MNCs number / cm2
	Control	Anti-RANKL ab		Control	Anti-RANKL ab
	41.0153	11.1256		78.421	119.474
	50.6583	33.3569		90.0266	113.684
	82.6352	11.1256		94.2105	106.316
	26.5486	19.5643		53.1579	130.526
	53.2487	79.2346		87.3684	121.053
	83.0246	47.5214		75.7895	117.368
	63.2357	37.2586		95.7895	121.579
	42.2459	40.3568		47.8947	108.421
	21.0211	42.5624		80.5263	88.421
	35.5869	40.3568		85.7895	111.579
	24.6988	38.5265		87.8947	119.474
	36.0325	18.4569		86.3158	117.895
	14.6936	24.2131
	4.00125	8.56459
	18.1012	33.3569
	7.45264	33.3569
	Figure4 D			Figure4 E
	B220-CD3-CD11b(dull)c-fms+ckit(high)			B220-CD3-CD11b(dull)c-fms+ckit(Int)
	Control	Anti-RANKL ab		Control	Anti-RANKL ab
	0.0082	0.014		0.062	0.1
	0.0061	0.025		0.054	0.12
	0.019	0.021		0.095	0.1
	0.0052	0.024		0.049	0.12
	0.012	0.013		0.07	0.12
	Figure4 F			Figure4 G
	B220-CD3-CD11b(dull)Ly6C(high)			c-fms+ cells (% in BMCs)
	Control	Anti-RANKL ab		Control	Anti-RANKL ab
	68.5	122		0.23	0.34
	46.5	182		0.22	0.37
	151	141		0.33	0.29
	73.6	159		0.24	0.39
	112	204		0.23	0.41
	Figure4 H			Figure4 I
	LSK			CLP
	Control	Anti-RANKL ab		Control	Anti-RANKL ab
	0.092	0.15		0.012	0.016
	0.081	0.19		0.0096	0.022
	0.12	0.16		0.0097	0.021
	0.14	0.16		0.012	0.015
	0.12	0.16		0.012	0.015
	Figure4 J
	CMP
	Control	Anti-RANKL ab
	0.21	0.28
	0.17	0.33
	0.22	0.29
	0.23	0.27
	0.22	0.28

## Sheet: Figure5.
	Figure5 A									Figure4 B
	RANKL			OPG			RANKL to OPG			Tnfsf11
	Non-treated	Discontinuation		Non-treated	Discontinuation		Non-treated	Discontinuation		Non-treated	Discontinuation
	78.117	134.18		2157.54	2355.82		0.036207	0.056957		0.665074	0.685461
	74.835	391.438		1889.5	2157.54		0.039606	0.181428		0.512276	0.454482
	109.214	324.145		2118.11	2623.43		0.051562	0.123558		1.20792	0.546922
	100.247	294.225		2332.59	2864.32		0.042977	0.102721		1.61473	0.817797
	Figure5 D
	Dis-AB	Dis-MV	Dis-EX	Dis-Total
	1.46241	1.04034	0.875	1.16788
	1.39885	1.062	1.05513	1.15068
	1.42137	1.10119	1.10132	1.11916
	1.18309	1.41059	1.00004	1.32001
	Figure5 E			Figure5 F
	TRAP+ MNCs number / cm2			TRAP+ MNCs number / cm2
	Control serum	EV(-) serum		Control serum	EV(-) serum
	168.421	68.4211		182.105	57.8947
	170.526	120		160	45.2632
	425.263	101.053		106.316	38.9474
	140	80		90.5263	38.9474
	150.526	50.5263
	125.263	54.7368
	Figure5 G
	Mouse; TRAP+ MNCs number / cm2
	AB		MV		Ex
	Cnt	Dis	Cnt	Dis	Cnt	Dis
	69.4737	122.105	52.6316	162.105	73.6842	83.1579
	63.1579	150.526	67.3684	144.211	57.8947	103.158
	122.105	158.947	71.5789	84.2105	76.8421	75.7895
	91.5789	158.947	68.4211	112.632	35.7895	105.263
	Figure5 H
	Human; TRAP+ MNCs number / cm2
	AB		MV		Ex
	Naïve	Treatment	Naïve	Treatment	Naïve	Treatment
	187.368	45.2632	233.684	50.5263	253.684	53.6842
	195.789	77.8947	189.474	33.6842	198.947	14.7368
	84.2105	76.8421	28.4211	2.10526	85.2632	76.8421
	109.474	73.6842	143.158	35.7895	86.3158	43.1579
	Figure5 I			Figure5 I
	Geometric MFI			EGFP+ cells
	Isotype Cnt IgG	Anti-RANKL ab		No Evs	Isotype Cnt IgG	Anti-RANKL ab
	497	451		0.5	15.65	9.23
	476	445		2.21	13.94	10.32
	468	452		3.25	19.55	15.06
	504	453		3.28	19.56	14.72
	493	427			26.35	14.32
	486	432			26.5	13.65
	453	435			23.82	12.05
		432				12.13

## Sheet: Figure6.
	Figure6 A
	Ob.S/BS			BFR			MS/BS			MAR
	Control	Discontinuation		Control	Discontinuation		Control	Discontinuation		Control	Discontinuation
	30.345	14.287		0.655	0.305		38.944	31.386		1.682	0.97
	31.791	21.384		0.649	0.181		41.629	17.639		1.56	1.024
	34.225	12.7457		0.873	0.511		41.363	29.159		2.109	1.752
	21.8247	3.569		0.571	0.092		35.304	8.477		1.618	1.08
	Figure6 B
		serum ALP
	Weeks	Control								Discontinuation
	-4	482.536	415.526	423.669	452.245	469.859	525.626	415.536	459.636	425.626	398.644	448.225	467.559	525.636	499.525	639.626	389.929
	-2	436.889	529.669	415.336	425.667	448.779	446.548	512.333	529.894	289.885	279.88	256.636	495.669	318.494	268.595	268.669	264.585
	0	416.485	512.959	428.464	529.626	601.878	448.669	398.669	445.887	246.552	186.265	238.226	323.525	216.115	224.995	236.558	188.664
	2	426.949	416.595	435	489.494	439.448	512.858	585.619	416.784	199.848	188.202	249.558	314.289	198.979	179.848	345.265	218.959
	4	528.448	529.889	569.585	409.448	379.484	419.494	619.848	495.949	126.29	234.191	285.191	159.565	169.484	189.494	219.797	129.515
	6	526.494	459.494	502.626	419.494	389.494	419.494	524.584	286	231.161	275.161	128.778	219.191	245.845	128.494	188.117	169.889
	8	432.494	419.118	414.449	610.447	378.141	414.779	397.118	419.494	234.949	199	121.449	137.449	197.161	248.494	269.484	315.161
	10	400.662	397.49	328.334	417.15	316.447	389.447	416.646	409.942	219.494	271.417	234.118	189.97	215.454	235.787	181.112	256.445
	12	384.949	359.494	339.494	349.19	326.494	408	400.066	394.779	234.661	247.449	216.669	228.119	264.669	224.161	228.494	189.449
	14	418.226	381.442	349.778	319.998	348.449	345.448	389.448	318.447	234.229	240.448	236.995	215.498	285.006	254.118	280.448	188.114
	16	418.449	440.115	348.447	288.62	378.949	378.94	412.115	368.449	234.669	198.117	318.779	169.787	248.959	277.448	303.448	267.998
	Figure6 C
	CFU-ALP			CFU-OB
	Control	Discontinuation		Control	Discontinuation
	3.15789	3.15789		5.26316	4.21053
	3.15789	3.15789		5.26316	3.15789
	4.21053	2.8421		5.26316	3.15789
	4.21053	2.10526		5.78947	4.21053
	4.63158	3.15789		6.31578	4.63158
	4.63158	2.10526		5.26316	4.63158
	Figure6 D
	Sca1+ALP+					Sca1-ALP+
	2 week		16 week			2 week		16 week
	Control	Discontinuation	Control	Discontinuation		Control	Discontinuation	Control	Discontinuation
	0.12	0.076	0.22	0.15		0.1223	0.107453	0.091	0.061
	0.16	0.079	0.25	0.13		0.11067	0.06	0.087	0.046
	0.18	0.079	0.22	0.11		0.16699	0.029	0.1	0.075
	0.17	0.089	0.28	0.21		0.107453	0.022	0.1	0.08
	Figure6 E
	PaS cells
	2 week		16 week
	Control	Discontinuation	Control	Discontinuation
	0.16	0.11	0.16	0.11
	0.23	0.11	0.17	0.11
	0.26	0.1	0.18	0.058
	0.24	0.11	0.2	0.12

## Sheet: FigureS2
	FigureS2B
	Weeks	Control					Continuation					Discontinuation
	0	5.652	6.557	5.488	4.625	4.591	6.57	7.2	6.57	6.161	6.06	6.467	6.009	5.464	6.313	6.433
	2	5.799	5.361	4.228	4.714	5.707	0.552	0.325	0.723	0.432	0.636	0.325	1.406	0.671	0.503	1.131
	4	4.712	5.195	5.471	5.807	5.594	1.137	1.818	1.292	0.698	1.168	1.074	8.527	3.469	5.985	1.043
	8	5.293	5.543	6.107	4.897	5.558	2.068	3.183	1.872	1.971	2.885	9.786	6.144	7.001	6.48	7.132
	12	2.696	3.23	2.945	2.977	3.166	0.61	0.584	0.741	0.61	2.488	3.553	3.135	4.048	3.455	3.782
	FigureS2C
	4-6 W			4-12 W
	Control	Discontinuation		Control	Discontinuation
	-14.4835	-25.7924		-25.5059	-66.6088
	-42.7722	-24.8711		-78.2251	-79.7135
	-30.4395	-54.8323		-68.6381	-70.2367
	-38.5347	-41.3161		-63.7025	-65.8026
	-41.2667	-53.6072		-42.8292	-86.5929
	-66.7943	-8.60194		-79.5405	-80.878
	-13.8049	-45.6967		-35.4069	-86.8615
	-48.1132	-46.3245		-66.3747	-77.853
	FigureS2D
	Trabecular BMD				BV/TV				Trabecular thickness
	Control	Continuation	Discontinuation		Control	Continuation	Discontinuation		Control	Continuation	Discontinuation
	446.3	519.1	408.7		5.39681	35.9076	3.47675		5.39681	35.9076	3.47675
	505.2	587.4	418.1		11.4685	44.2398	4.28453		11.4685	44.2398	4.28453
	452.2	542.8	406.4		5.54765	38.6835	5.59344		5.54765	38.6835	5.59344
	401.6	557.3	395.8		5.8756	40.1492	4.98011		5.8756	40.1492	4.98011
	Cortical BMD				Cortical thickness
	Control	Continuation	Discontinuation		Control	Continuation	Discontinuation
	757.1	747.1	711.8		182.017	237.007	168.827
	742.5	776.3	707		185.977	253.917	161.506
	725.8	724.4	704.3		161.312	228.476	160.827
	746	760.8	689.7		172.122	274.618	157.954

## Sheet: FigureS3
	FigureS3B-left
	Weeks	Control					Continuation					Discontinuation
	0	3.925	3.292	3.955	4.543	4.397	4.162	4.162	4.014	5.324	3.984	4.775	4.191	4.659	3.984	4.073
	2	2.758	3.585	2.696	3.262	2.359	0.407	0.382	0.688	0.533	0.407	0.636	0.432	0.533	0.382	0.357
	4	2.899	3.17	3.415	2.818	4.051	0.796	0.903	0.606	3.995	0.85	0.796	0.796	0.876	1.037	0.957
	8	3.661	4.103	4.305	4.339	4.807	0.827	1.205	0.569	3.845	1.152	7.874	6.766	7.133	8.179	8.59
	12	3.095	3.221	3.477	3.976	3.823	0.672	4.557	0.621	3.349	0.759	5.225	3.932	4.557	4.242	4.376
	FigureS3B-Right
	Weeks	Control						Discontinuation
	-4	4.395	5.423	4.854	5.568	5.423	5.221	4.095	5.135	5.005	5.152	5.156	5.289
	-2	4.425	5.545	5.036	5.384	5.352	5.741	0.74	0.718	0.806	0.828	0.784	0.762
	0	4.485	4.757	5.48	4.696	5.004	5.224	1.05	0.697	0.718	1.072	1.254	0.938
	2	3.31	3.671	3.841	4.13	4.515	3.447	1.005	0.828	0.806	0.828	0.632	0.784
	4	3.985	3.531	4.159	4.188	4.425	4.605	0.894	0.982	1.05	0.938	0.784	1.415
	6	4.819	4.336	4.365	4.13	5.288	5.448	0.74	1.072	1.005	0.894	1.346	8.719
	8	4.757	5.577	5.545	5.32	5.224	5.448	2.312	3.31	4.425	5.352	8.48	7.975
	10	4.071	3.727	4.545	4.218	4.395	4.849	10.724	7.412	7.709	8.599	7.301	4.727
	12	3.059	4.011	3.892	3.599	3.922	3.833	8.378	5.23	7.596	10.07	6.001	5.328
	14	3.483	5.068	3.803	3.541	3.774	5.23	5.864	7.943	6.955	12.376	4.749	4.071
	FigureS3C
	Trabecular BMD			BV/TV			Trabeculat thickness			Trabecular number
	Control	Discontinuation		Control	Discontinuation		Control	Discontinuation		Control	Discontinuation
	258.9	247.9		0.4422	0.43965		7.1058	6.95752		0.6223	0.63191
	267.5	310.3		0.59093	0.7314		7.35865	8.95381		0.80304	0.81686
	298.9	493.8		0.57062	1.1706		8.24583	14.5656		0.69201	0.80368
	281	423.1		0.79014	0.70561		7.99645	12.4643		0.98811	0.5661
	374.2	278.6		1.1604	0.50734		10.2392	8.07637		1.1333	0.62818
	Cortical BMD			Cortical thickness			Cortical porosity
	Control	Discontinuation		Control	Discontinuation		Control	Discontinuation
	640.3	621.4		179.288	161.513		2.7827	3.13779
	636.2	619.1		201.112	164.072		3.08995	2.95123
	648.1	625.8		170.459	161.401		2.66148	3.11716
	679.1	595.7		171.629	156.2		2.76429	3.20125
	665.5	629.7		174.632	165.46		2.48587	2.8628
	Spine BMD			Spine BV/TV
	Control	Discontinuation		Control	Discontinuation
	408.2	387		13.471	16.601
	408.3	385.6		12.315	15.124
	415.8	404.6		11.507	17.414
	430.4	394.7		14.963	16
	410.9	377.3		14.102	13.229

## Sheet: FigureS4
	FigureS4
	Ob.S/BS			Osteoid Surface/BS			Osteoid thickness/BS
	Control	Anti-RANKL ab		Control	Anti-RANKL ab		Control	Anti-RANKL ab
	7.93238	2.53613		14.9116	4.05329		3.94811	3.89282
	10.9429	0		10.1864	0		4.60461	0
	11.9243	2.92859		12.4624	5.1137		5.39851	3.5131
	MAR			BFR			MS/BS
	Control	Anti-RANKL ab		Control	Anti-RANKL ab		Control	Anti-RANKL ab
	1.54177	1.23228		0.581235	0.18643		37.6991	15.1288
	1.24371	0		0.532982	0		42.854	0
	1.29867	1.27859		0.611498	0.345779		47.0865	27.0439

## Sheet: FigureS5
	FigureS5
	CD11bintLy6Chigh in BMC
	Control	Anti-RANKL ab
	0.99	1.12
	1.12	1.1
	1.06	1.02
	1.15	1.23
	0.97	1.12

[truncated: 5 more sheets: FigureS6, FigureS7, FigureS8, Table. S1, Table. S2]
